# Supplementary material
Source: PubMed Central journal article supplement (PMC3738242)
Supplement: jn.112.168021_nutrition168021SupplementaryData1.pdf [file jn.112.168021_nutrition168021SupplementaryData1.pdf]

## Online Supporting Material

**Supplemental Table 1** Composition of the protein blend and whey protein beverages<sup>1</sup>

|                            | PB                    | WP   |
|----------------------------|-----------------------|------|
|                            | <i>g/100g product</i> |      |
| Protein                    | 87.1                  | 87.3 |
| Fat, acid hydrolysis       | 2.09                  | 0.80 |
| Ash                        | 3.62                  | 2.82 |
| Moisture                   | 6.57                  | 7.26 |
| Alanine                    | 3.38                  | 4.66 |
| Serine                     | 4.60                  | 4.38 |
| Aspartic Acid              | 7.96                  | 10.1 |
| Cysteine                   | 0.99                  | 2.25 |
| Glutamic Acid              | 18.7                  | 17.1 |
| Glycine                    | 2.04                  | 1.51 |
| Proline                    | 7.61                  | 5.98 |
| Tyrosine                   | 4.02                  | 2.71 |
| Arginine                   | 3.55                  | 1.93 |
| Isoleucine <sup>2</sup>    | 4.73                  | 5.85 |
| Leucine <sup>2</sup>       | 8.09                  | 9.53 |
| Lysine <sup>2</sup>        | 6.79                  | 8.64 |
| Methionine <sup>2</sup>    | 2.18                  | 2.06 |
| Phenylalanine <sup>2</sup> | 4.13                  | 2.83 |
| Threonine <sup>2</sup>     | 4.38                  | 6.51 |
| Tryptophan <sup>2</sup>    | 1.06                  | 1.38 |
| Valine <sup>2</sup>        | 5.45                  | 5.56 |
| Histidine <sup>2</sup>     | 2.18                  | 1.54 |
| Total EAA                  | 39.0                  | 43.9 |

<sup>1</sup>Protein blend (PB) and whey protein (WP)

<sup>2</sup>Represent the EAA (Essential Amino Acids)
