# Supplementary material
Source: PubMed Central journal article supplement (PMC3738242)
Supplement: jn.112.168021_nutrition168021SupplementaryData2.pdf [file jn.112.168021_nutrition168021SupplementaryData2.pdf]

### Online Supporting Material

**Supplemental Table 2** Serum insulin, plasma lactate and glucose concentrations in young adults at rest during the post-exercise recovery period following ingestion of the protein blend (PB) or whey protein (WP) 1 h after completion of resistance exercise<sup>1</sup>

|         | Rest        | Time post-ingestion (min) |              |              |                             |              |             |             |
|---------|-------------|---------------------------|--------------|--------------|-----------------------------|--------------|-------------|-------------|
|         |             | 0                         | 20           | 40           | 60                          | 80           | 100         | 140         |
| Insulin |             | <i>pmol/L</i>             |              |              |                             |              |             |             |
| PB      | 27 ± 4      | 35 ± 9                    | 60 ± 14*     | 68 ± 10*     | 43 ± 7                      | 29 ± 4       | 27 ± 3      | 22 ± 2      |
| WP      | 24 ± 2      | 28 ± 5                    | 60 ± 9*      | 70 ± 14*     | 49 ± 8*                     | 31 ± 6       | 21 ± 3      | 16 ± 3      |
| Lactate |             | <i>mmol/L</i>             |              |              |                             |              |             |             |
| PB      | 0.80 ± 0.04 | 2.18 ± 0.31*              | 1.48 ± 0.15* | 1.15 ± 0.11* | 1.03 ± 0.08*## <sup>2</sup> | 0.88 ± 0.06# | 0.89 ± 0.09 | 0.82 ± 0.08 |
| WP      | 0.85 ± 0.07 | 2.47 ± 0.32*              | 1.69 ± 0.22* | 1.45 ± 0.16* | 1.31 ± 0.11*                | 1.16 ± 0.13* | 0.98 ± 0.11 | 0.94 ± 0.18 |
| Glucose |             | <i>mmol/L</i>             |              |              |                             |              |             |             |
| PB      | 4.90 ± 0.08 | 5.18 ± 0.29               | 4.99 ± 0.21  | 5.05 ± 0.13  | 4.98 ± 0.08                 | 4.96 ± 0.09  | 4.90 ± 0.08 | 4.89 ± 0.07 |
| WP      | 4.93 ± 0.07 | 5.12 ± 0.22               | 5.04 ± 0.14  | 5.05 ± 0.13  | 4.96 ± 0.09                 | 4.96 ± 0.08  | 4.97 ± 0.07 | 4.95 ± 0.06 |

<sup>1</sup>Data are mean ± SEM, n=9 (WP) or 10 (PB). \*Different from Rest, P < 0.05. Symbols indicate different from PB: #P < 0.05,

<sup>2</sup>Symbols indicate different from PB: ##P = 0.07.
